# Supplementary material for: Phylogenomics of Prokaryotic Ribosomal Proteins
Source: PLoS One. 2012 May 16;7(5):e36972. doi: 10.1371/journal.pone.0036972 (PMC3353972; doi:10.1371/journal.pone.0036972)
Supplement: Table S6 — Representative genomes for archaea, bacteria and eukaryotes. (XLS) [file pone.0036972.s006.xls]

## Sheet: Sheet1
taxID	ftp_name
3702	Arabidopsis thaliana
330879	Aspergillus fumigatus Af293
3055	Chlamydomonas reinhardtii
347515	Leishmania major strain Friedlin
431895	Monosiga brevicollis MX1
10090	Mus musculus
744533	Naegleria gruberi strain NEG-M
412030	Paramecium tetraurelia strain d4-2
36329	Plasmodium falciparum 3D7
237631	Ustilago maydis 521
329726	Acaryochloris_marina_MBIC11017
525909	Acidimicrobium_ferrooxidans_DSM_10331
240015	Acidobacterium_capsulatum_ATCC_51196
339671	Actinobacillus_succinogenes_130Z
380703	Aeromonas_hydrophila_ATCC_7966
349741	Akkermansia_muciniphila_ATCC_BAA_835
572547	Aminobacterium_colombiense_DSM_12261_uid47083
224324	Aquifex_aeolicus
322710	Azotobacter_vinelandii_DJ
295405	Bacteroides_fragilis_YCH46
600809	Blattabacterium__Periplaneta_americana__BPLAN
257313	Bordetella_pertussis
412418	Borrelia_recurrentis_A1
366602	Caulobacter_K31
290315	Chlorobium_limicola_DSM_245
309798	Coprothermobacter_proteolyticus_DSM_5265
360115	Coxiella_burnetii_RSA_331
269798	Cytophaga_hutchinsonii_ATCC_33406
159087	Dechloromonas_aromatica_RCB
639282	Deferribacter_desulfuricans_SSM1_uid46653
216389	Dehalococcoides_BAV1
319795	Deinococcus_geothermalis_DSM_11300
525897	Desulfomicrobium_baculatum_DSM_4028
246195	Dichelobacter_nodosus_VCS1703A
515635	Dictyoglomus_turgidum_DSM_6724
479437	Eggerthella_lenta_DSM_2243
445932	Elusimicrobium_minutum_Pei191
314225	Erythrobacter_litoralis_HTCC2594
511145	Escherichia_coli_K_12_substr__MG1655
381764	Fervidobacterium_nodosum_Rt17-B1
59374	Fibrobacter_succinogenes_S85
393115	Francisella_tularensis_FSC_198
326424	Frankia_alni_ACN14a
379066	Gemmatimonas_aurantiaca_T_27
251221	Gloeobacter_violaceus
373903	Halothermothrix_orenii_H_168
498761	Heliobacterium_modesticaldum_Ice1
316274	Herpetosiphon_aurantiacus_ATCC_23779
543734	Lactobacillus_casei
156889	Magnetococcus_MC-1
265311	Mesoplasma_florum_L1
481448	Methylacidiphilum_infernorum_V4
582744	Methylovorus_SIP3_4
2098	Mycoplasma_hominis
457570	Natranaerobius_thermophilus_JW_NM_WN_LF
598659	Nautilia_profundicola_AmH
662598	Neisseria_meningitidis_alpha14
323261	Nitrosococcus_oceani_ATCC_19707
335283	Nitrosomonas_eutropha_C71
63737	Nostoc_punctiforme_PCC_73102
262768	Onion_yellows_phytoplasma
452637	Opitutus_terrae_PB90_1
264201	Parachlamydia_sp_UWE25
123214	Persephonella_marina_EX_H1
530564	Pirellula_staleyi_DSM_6068_uid43209
59919	Prochlorococcus_marinus_MED4
290512	Prosthecochloris_aestuarii_DSM_271
269796	Rhodospirillum_rubrum_ATCC_11170
357808	Roseiflexus_RS-1
266117	Rubrobacter_xylanophilus_DSM_9941
309807	Salinibacter_ruber_DSM_13855
146919	Salinibacter_ruber_uid47323
526218	Sebaldella_termitidis_ATCC_33386
60481	Shewanella_MR-7
580332	Sideroxydans_lithotrophicus_ES_1_uid46801
234267	Solibacter_usitatus_Ellin6076
479434	Sphaerobacter_thermophilus_DSM_20745
158878	Staphylococcus_aureus_Mu50
391295	Streptococcus_suis_05ZYH33
32051	Synechococcus_WH_7803
399726	Thermoanaerobacter_X514
525904	Thermobaculum_terrenum_ATCC_BAA_798
289376	Thermodesulfovibrio_yellowstonii_DSM_11347
309801	Thermomicrobium_roseum_DSM_5159
262724	Thermus_thermophilus_HB27
292415	Thiobacillus_denitrificans_ATCC_25259
203124	Trichodesmium_erythraeum_IMS101
565575	Ureaplasma_urealyticum_serovar_10_ATCC_33699
78245	Xanthobacter_autotrophicus_Py2
509169	Xanthomonas_campestris_B100
